# Supplementary material for: Identification and localization of xylose-binding proteins as potential biomarkers for liver fibrosis/cirrhosis
Source: Royal Society of Chemistry journal article supplement (doi:10.1039/c5mb00703h), 2015-12-02
Supplement: c5mb00703h1.pdf [file c5mb00703h1.pdf]

## Electronic Supplementary Information

# Identification and localization of Xylose-binding proteins and as potential biomarkers for liver fibrosis/cirrhosis

Yaogang Zhong, Xiu-Xuan Sun, Peixin Zhang, Xinmin Qin, Wentian Chen, Yonghong Guo,  
Zhansheng Jia, Huijie Bian\*, Zheng Li\*

### CONTENTS:

Materials and Methods

Protein extraction

Isolation of XBPs.

Identification by LC-OrbitrapMS/MS

Distribution and ontology analysis of XBPs

Network and functional analysis

Characteristics of XBPs

Reference

**Scheme 1.** Schematic flow diagram of the integrated strategy

**Fig. S1.** Cellular protein and sera concentration

**Fig. S2.** GO classification of the identified XBPs using WEGO

**Fig. S3.** Protein interaction network analysis

**Table S1.** Characteristics of liver cirrhosis patient group

**Table S2.** Detailed information of XBPs significantly differential expressed in the activated LX-2

**Table S3.** The detail information of the main KEGG pathway

## Materials and Methods

### ***Protein extraction.***

The total protein of HSCs was extracted with T-PER Reagent (Pierce Biotechnology Inc., USA) according to the manufacturer's instructions. The procedures were briefly described as before.<sup>S1</sup> The supernatant was immediately transferred for use or stored at -80°C. Protein concentration in cell lysates was determined by Bradford assay kit (Pierce) (Fig. S1).

### ***Isolation of XBPs.***

The XMPCs were prepared according to the protocol<sup>S2-S4</sup> with some modifications. The XMPCs were blocked with 400  $\mu$ L blocking buffer (including 2% ethanolamine and 0.1% BSA) at 37°C for 1 h and then washed three times with the binding buffer (20 mmol·L<sup>-1</sup> Tris-HCl, 0.5 mol·L<sup>-1</sup> NaCl, 10 mmol·L<sup>-1</sup> CaCl<sub>2</sub>, 10 mmol·L<sup>-1</sup> MnCl<sub>2</sub>, 6 mmol·L<sup>-1</sup> MnCl<sub>2</sub>, pH7.2), 2 mg protein, and 20  $\mu$ L 100 mmol·L<sup>-1</sup> PMSF were added, then incubated with the binding buffer for 2 h under gentle shaking. Unbound proteins were removed from the conjugates by washing five or six times with the washing buffer (20 mmol·L<sup>-1</sup> Tris-HCl, 0.05% Tween-20, pH7.2) until proteins did not exist in supernatant. The XBPs were eluted with 400  $\mu$ L eluting fluid (8 mol·L<sup>-1</sup> Urea, 0.1 mol·L<sup>-1</sup> NH<sub>4</sub>HCO<sub>3</sub>) for 1 h, then added 10  $\mu$ L PMSF and stored at -80°C. The purified XBPs were quantitated by the Bradford Assay (Fig. S1).

### ***Identification by LC-OrbitrapMS/MS.***

The purified XBPs were treated with reduction, alkylation and trypsin digestion according to the protocol.<sup>S2</sup> The peptide sequencing was identified by LC-Orbitrap MS/MS,<sup>S5</sup> LC-MS system consist of LTQ-Orbitrap XL ETD mass spectrometers (ThermoFisher) equipped with Easy-nLC II System. Five microliters of trypsin-digested solutions were loaded by an auto-sampler on a Easy-nLC II system with an pre-column (2 cm×100  $\mu$ m, 5  $\mu$ m C18-A1) and analytical column (10 cm×75  $\mu$ m, 3  $\mu$ m C18-A2). Peptides were eluted from the capillary column at a flow rate of 300 nL·min<sup>-1</sup> to the MS through a nano-spray emitter tip. Spray voltage was set to 1.95 kV and capillary temperature was 200°C. The mobile phases consisted of A (water with 0.1% formic acid) and B (acetonitrile with 0.1% formic acid). The three-step linear gradient of 3-9% B in 10 min, 9-41% in 70 min, 41-81% in 15 min, and 81% B for 25 min was used throughout this study. MS scans were performed to select 10 intense peaks for subsequently MS/MS scans.

Proteome Discoverer 1.2 software (Thermo Fisher) with SEQUEST search managed the LC pump and the automatic spectral recording. MS/MS ion search was performed in International Protein Index (IPI.HUMAN. v3.73. fasta) databases. A mass tolerance of  $\pm$ 10ppm for the precursor ions and a tolerance of  $\pm$  1 Da for fragment ions were used. One missed cleavage was allowed. Oxidation (M) was set as a variable modification and carboxymethyl (C) was set as a fixed modification. The identified proteins were filtered using high confidence (FDR=0.01) on the peptide level. The obtained data were also used to calculate the peak area. The peak area values of proteins in one sample were compared to those in another sample, and expression levels of proteins were evaluated according to the peak area correlation between the two samples.

### ***Distribution and ontology analysis of XBPs.***

The accession number list of the proteins identified also underwent functional analysis by

Database for Annotation, Visualization, and Integrated Discovery (DAVID)<sup>S6</sup> online tool (<http://david.abcc.ncifcrf.gov/>). Functional annotation clustering of our accession numbers was performed on the basis of GO, Genomes pathway database (KEGG), selecting uniprot\_accession as identifier and peptide list as list type.

### ***Network and functional analysis.***

The list of accession number of the proteins identified was processed by pathway analysis using KEGG pathway (<http://www.kegg.jp/>) and String (<http://string-db.org/>) tool.

### ***Characteristics of XBPs.***

The characteristics of the isolated XBPs were analyzed according to their consensus sequence with Motif-x software (v1.2 10.05.06). All complete and unbiased motif searches were performed in a set of the isolated XBPs using each of the 20 amino acids as a central residue with a 13-amino acid spread; the occurrence is set at 5, the significance is set at  $10^{-5}$ , and the IPI human proteome is set as background. The motif scores were calculated by taking the sum of the negative log probabilities used to fix each position of the motif. The extracted non-redundant consensus sequences were applied to WebLogo to create relative frequency plots.<sup>S7, S8</sup>

### **Reference**

- S1. Y. Qin, Y. Zhong, G. Yang, T. Ma, L. Jia, C. Huang and Z. Li, *Molecules*, 2014, **19**, 19845-19867.
- S2. G. Yang, W. Chu, H. Zhang, X. Sun, T. Cai, L. Dang, Q. Wang, H. Yu, Y. Zhong, Z. Chen, F. Yang and Z. Li, *Proteomics*. 2013, **13**, 878-892.
- S3. X. Sun, G. Yang, S. Sun, R. Quan, W. Dai, B. Li, C. Chen and Z. Li, *Curr Pharm Biotechnol*. 2009, **10**, 753-760.
- S4. G. Nan, H. Yan, G. Yang, Q. Jian, C. Chen and Z. Li, *Curr Pharm Biotechnol*. 2009, **10**, 138-146.
- S5. J.C. Silva, M.V. Gorenstein, G. Li, J. Vissers, S. Geromanos, *Mol Cell Proteomics*. 2006, **5**, 144-156.
- S6. D. Huang, B. Sherman and R. Lempicki, *Nature Protoc*, 2009, **4**, 44-57.
- S7. G.E. Crooks, G. Hon, J.M. Chandonia and S.E. Brenner, *Genome Research*, 2004, **14**, 1188-1190.
- S8. T.D. Schneider and R.M. Stephens, *Nucleic Acids Res*. 1990, **18**, 6097-6100.

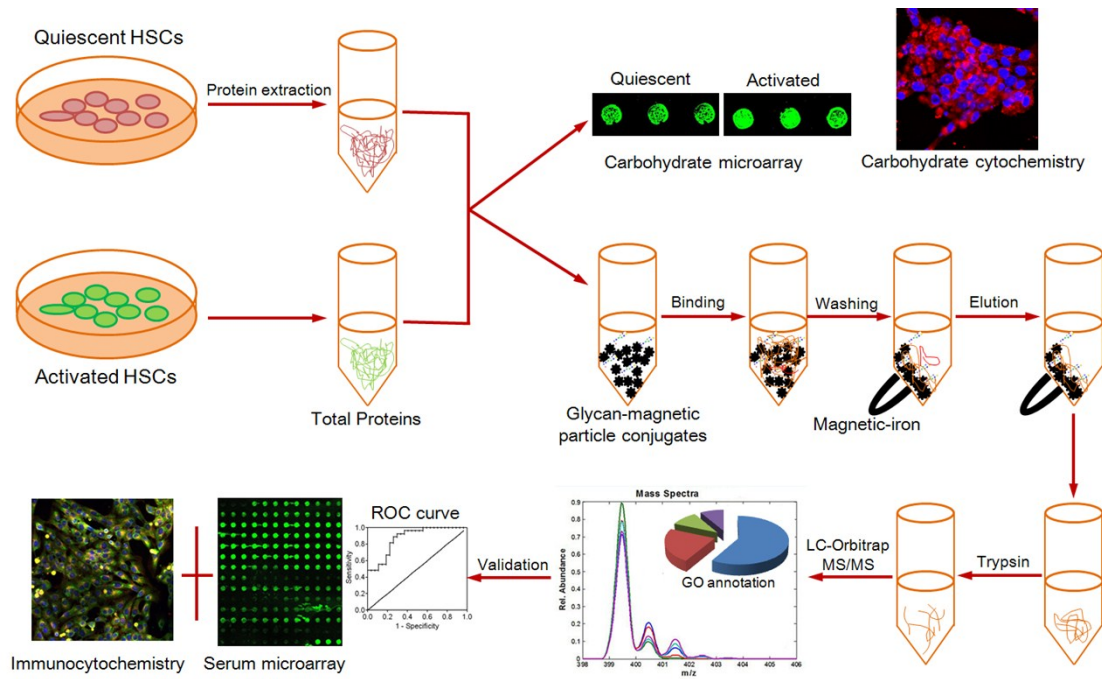

**Scheme 1.** Schematic flow diagram of the integrated strategy.

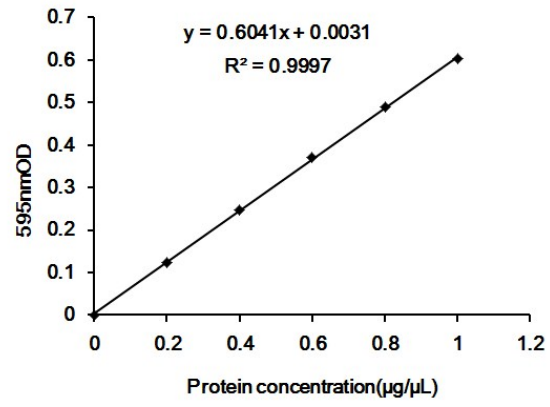

**Fig. S1** Cellular protein and sera concentration. The protein concentrations of HSCs and sera samples were measured using Bradford assay.



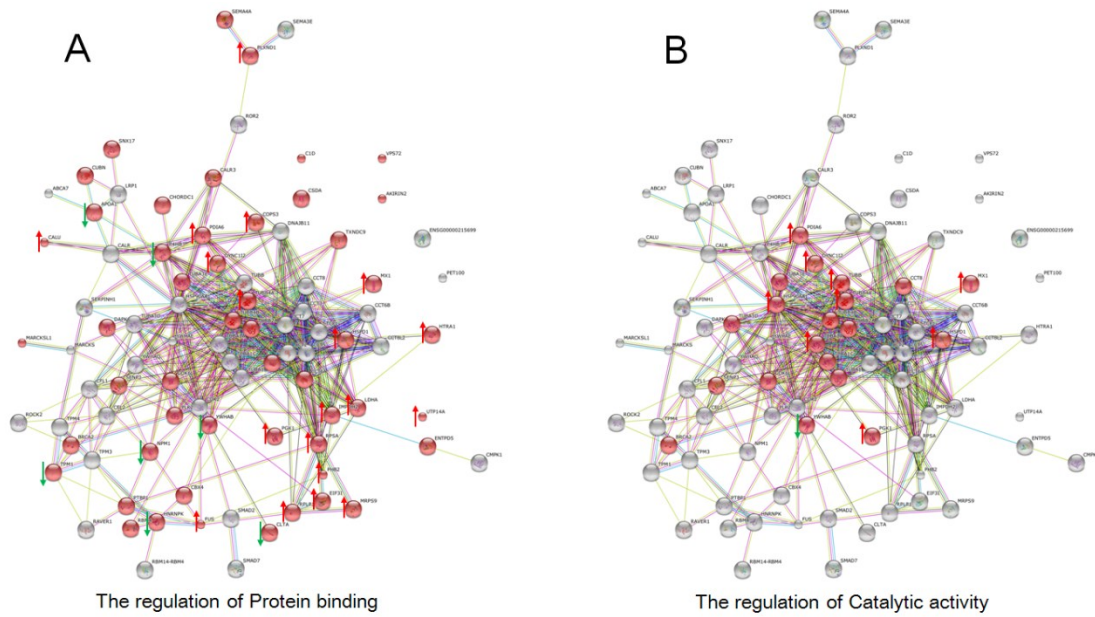

**Fig. S3** Protein interaction network analysis revealed XBPs (red sphere) responsible for protein binding (A) and catalytic activity (B) that were up-regulated (red arrow) or down-regulated (green arrow) in the activated LX-2 through enrichment analysis of molecular function.

**Table S1 Characteristics of liver cirrhosis patient group**

| Hepatitis/<br>Cirrhosis | n  | Males, (n) % | Age, years           | HBsAg<br>(IU /mL)    | HbsAb<br>(PEI U/mL) | HbeAg<br>(PEI U/mL)  | AST<br>(IU/L)        | ALT<br>(IU/L)        | GGT<br>(IU/L) | Albumin<br>(g/L)    | Total bilirubin<br>( $\mu$ mol/L) | AFP<br>(ng/mL)      |
|-------------------------|----|--------------|----------------------|----------------------|---------------------|----------------------|----------------------|----------------------|---------------|---------------------|-----------------------------------|---------------------|
|                         | 60 | 40 (66.0)    | 60.0 (55.5-<br>63.5) | 298.5<br>$\pm$ 132.8 | 17.15<br>$\pm$ 8.15 | 42.88<br>$\pm$ 15.66 | 87.21<br>$\pm$ 69.06 | 69.82<br>$\pm$ 51.91 | 142           | 36.80<br>$\pm$ 5.91 | 34.88<br>$\pm$ 43.45              | 58.9<br>$\pm$ 193.4 |

AST, aspartate aminotransferase; ALT, alanine aminotransferase; GGT, glutamyltranspeptidase; AFP,  $\alpha$ -fetoprotein.



**Table S2. Detailed information of XBPs significantly differential expressed in the activated LX-2**

| IPI                          | Protein Acc. No. | Protein name                                           | No. of unique peptides | M.W. (kDa) | Gene symbol | Mass   | Score | HSCs |   | (A/Q)                 | Subcellular Location                                                                         |
|------------------------------|------------------|--------------------------------------------------------|------------------------|------------|-------------|--------|-------|------|---|-----------------------|----------------------------------------------------------------------------------------------|
|                              |                  |                                                        |                        |            |             |        |       | Q    | A | Fold change (p-value) |                                                                                              |
| <b>Up-regulated proteins</b> |                  |                                                        |                        |            |             |        |       |      |   |                       |                                                                                              |
| IPI00953530                  | H9KVD3_HUMAN     | Interferon-induced GTP-binding protein Mx1             | 2                      | 15.1       | MX1         | 1126.6 | 4.39  | Q    | A | 1.95(0.032)           | Cytoplasm; Endoplasmic reticulum membrane; Peripheral membrane protein; perinuclear region;  |
| IPI00941900                  | CALU_HUMAN       | Calumenin                                              | 3                      | 37.1       | CALU        | 825.91 | 3.64  | Q    | A | 1.53(0.050)           | Endoplasmic reticulum lumen; Secreted; Melanosome; Sarcoplasmic reticulum lumen <sup>s</sup> |
| IPI00940505                  | UT14A_HUMAN      | U3 small nucleolar RNA-associated protein 14 homolog A | 2                      | 69.2       | UTP14A      | 954.46 | 11.75 | Q    | A | 1.63(0.009)           | Nucleus & nucleolus;                                                                         |
| IPI00917575                  | CH60_HUMAN       | 60 kDa heat shock protein                              | 2                      | 55.0       | HSPD1       | 752.88 | 6.66  | Q    | A | 1.56(0.013)           | Mitochondrion matrix                                                                         |
| IPI00916278                  | DC112_HUMAN      | Cytoplasmic dynein 1 intermediate chain 2              | 2                      | 12.3       | DYNC112     | 975.93 | 3.67  | Q    | A | 3.47(<0.001)          | Cytoplasm & cytoskeleton <sup>s</sup>                                                        |
| IPI00910487                  | SERPH_HUMAN      | Serpin H1                                              | 2                      | 44.2       | SERPINH1    | 830.40 | 6.64  | Q    | A | 4.21(<0.001)          | Endoplasmic reticulum lumen;                                                                 |
| IPI00909158                  | PGK1_HUMAN       | Phosphoglycerate kinase 1                              | 2                      | 30.0       | PGK1        | 1012.0 | 6.24  | Q    | A | 2.51(0.007)           | Cytoplasm;                                                                                   |
| IPI00908770                  | TBB4A_HUMAN      | Tubulin beta chain                                     | 5                      | 35.9       | TUBB        | 1354.7 | 40.63 | Q    | A | 1.52(0.050)           | Cytoplasm & cytoskeleton;                                                                    |
| IPI00873656                  | SEPT7_HUMAN      | Septin-7                                               | 2                      | 44.8       | 7-Sep       | 762.35 | 3.44  | Q    | A | 4.15(<0.001)          | Cytoplasm; Chromosome & centromere & kinetochore; cytoskeleton & spindle; Midbody;           |
| IPI00798361                  | RSSA_HUMAN       | 40S ribosomal protein SA                               | 2                      | 16.9       | RPSA        | 999.50 | 3.87  | Q    | A | 2.10(0.031)           | Cell membrane; Cytoplasm; Nucleus <sup>s</sup>                                               |
| IPI00789484                  | Q6P657_HUMAN     | Plexin-D1                                              | 3                      | 6.7        | PLXND1      | 737.71 | 14.43 | ND   | A | 3.57(<0.001)          | Cell membrane;                                                                               |
| IPI00644989                  | PDIA6_HUMAN      | Protein disulfide-isomerase A6                         | 4                      | 48.1       | PDIA6       | 764.43 | 6.09  | Q    | A | 3.74(<0.001)          | Endoplasmic reticulum lumen <sup>s</sup> ; Cell membrane; Melanosome;                        |

|             |             |                                                      |   |      |         |        |       |    |   |              |                                                                                                                                                                    |
|-------------|-------------|------------------------------------------------------|---|------|---------|--------|-------|----|---|--------------|--------------------------------------------------------------------------------------------------------------------------------------------------------------------|
| IPI00642205 | EIF31_HUMAN | Eukaryotic translation initiation factor 3 subunit I | 2 | 14.1 | EIF31   | 658.80 | 3.16  | Q  | A | 3.57(<0.001) | Cytoplasm <sup>s</sup>                                                                                                                                             |
| IPI00514049 | KCY_HUMAN   | UMP-CMP kinase                                       | 4 | 19   | CMPK1   | 760.88 | 3.16  | Q  | A | 1.60(0.028)  | Nucleus; Cytoplasm;                                                                                                                                                |
| IPI00027252 | PHB2_HUMAN  | Prohibitin-2                                         | 2 | 33.3 | PHB2    | 608.31 | 3.48  | Q  | A | 2.31(0.043)  | Mitochondrion inner membrane <sup>s</sup> ; Cytoplasm <sup>s</sup> ; Nucleus <sup>s</sup> ;                                                                        |
| IPI00020599 | CALR3_HUMAN | Calreticulin                                         | 2 | 48.1 | CALR    | 1196.1 | 12.34 | Q  | A | 1.62(0.011)  | Endoplasmic reticulum lumen; Cytoplasm & cytosol; Secreted & extracellular space & extracellular matrix; Cell surface; Sarcoplasmic reticulum lumen <sup>s</sup> ; |
| IPI00012011 | COF1_HUMAN  | Cofilin-1                                            | 4 | 18.5 | CFL1    | 597.61 | 22.67 | Q  | A | 4.83(<0.001) | Nucleus matrix; Cytoplasm & cytoskeleton; Cell projection & ruffle membrane; Peripheral membrane protein; lamellipodium membrane;                                  |
| IPI00008527 | RLA1_HUMAN  | 60S acidic ribosomal protein P1                      | 2 | 11.5 | RPLP1   | 851.95 | 9.76  | ND | A | —(<0.001)    | Cytoplasm;                                                                                                                                                         |
| IPI00413344 | COF2_HUMAN  | Cofilin-2                                            | 2 | 18.7 | CFL2    | 1098.6 | 18.23 | ND | A | —(<0.001)    | Nucleus matrix <sup>s</sup> ; Cytoplasm & cytoskeleton <sup>s</sup> ;                                                                                              |
| IPI00025721 | CSN3_HUMAN  | COP9 signalosome complex subunit 3                   | 3 | 47.8 | COPS3   | 888.35 | 3.80  | ND | A | —(<0.001)    | Cytoplasm; Nucleus;                                                                                                                                                |
| IPI00008454 | DJB11_HUMAN | DnaJ homolog subfamily B member 11                   | 2 | 40.5 | DNAJB11 | 992.43 | 6.42  | ND | A | —(<0.001)    | Endoplasmic reticulum lumen;                                                                                                                                       |
| IPI00902529 | HTRA1_HUMAN | Serine protease HTRA1                                | 3 | 48.4 | HTRA1   | 744.83 | 3.50  | ND | A | —(<0.001)    | Secreted; Cytoplasm & cytosol;                                                                                                                                     |
| IPI00641924 | RT09_HUMAN  | 28S ribosomal protein S9                             | 2 | 45.8 | MRPS9   | 623.29 | 2.99  | ND | A | —(<0.001)    | Mitochondrion;                                                                                                                                                     |
| IPI00909890 | FUS_HUMAN   | RNA-binding protein FUS                              | 4 | 44.8 | FUS     | 751.66 | 9.70  | ND | A | —(<0.001)    | Nucleus;                                                                                                                                                           |
| IPI00219301 | MARCS_HUMAN | Myristoylated alanine-rich C-kinase substrate        | 2 | 31.5 | MARCKS  | 892.94 | 7.64  | ND | A | —(<0.001)    | Cytoplasm & cytoskeleton <sup>p</sup> ; Membrane; Lipid-anchor <sup>s</sup> ;                                                                                      |
| IPI00795143 | IMDH2_HUMAN | Inosine-5'-monophosphate dehydrogenase 2             | 3 | 10.4 | IMPDH2  | 579.81 | 2.95  | ND | A | —(<0.001)    | Cytoplasm; Nucleus;                                                                                                                                                |

|                                |              |                                                       |   |       |              |        |       |    |    |              |                                                                                                     |
|--------------------------------|--------------|-------------------------------------------------------|---|-------|--------------|--------|-------|----|----|--------------|-----------------------------------------------------------------------------------------------------|
| IPI00604607                    | Q2VPJ6_HUMAN | Heat shock protein HSP 90-alpha                       | 4 | 63.2  | HSP90A<br>A1 | 576.28 | 6.23  | ND | A  | —(<0.001)    | Cytoplasm; Melanosome; Cell membrane;                                                               |
| IPI00007752                    | TBB4A_HUMAN  | Tubulin beta-4A chain                                 | 7 | 35.9  | TUBB4A       | 911.96 | 32.17 | Q  | A  | 4.61(<0.001) | Cytoplasm & cytoskeleton;                                                                           |
| IPI00788938                    | LDHA_HUMAN   | L-lactate dehydrogenase A chain                       | 2 | 25.2  | LDHA         | 624.80 | 2.76  | ND | A  | —(<0.001)    | Cytoplasm;                                                                                          |
| <b>Down-regulated proteins</b> |              |                                                       |   |       |              |        |       |    |    |              |                                                                                                     |
| IPI00853525                    | APOA1_HUMAN  | Apolipoprotein A-I                                    | 7 | 27.9  | APOA1        | 966.97 | 24.57 | Q  | A  | 0.25(<0.001) | Secreted                                                                                            |
| IPI00910322                    | TPM4_HUMAN   | Tropomyosin alpha-4 chain                             | 3 | 17.6  | TPM4         | 1170.6 | 10.78 | Q  | A  | 0.59(0.015)  | Cytoplasm & cytoskeleton;                                                                           |
| IPI00909308                    | B7Z596_HUMAN | Tropomyosin alpha-1 chain                             | 2 | 17.8  | TPM1         | 730.87 | 6.85  | Q  | A  | 0.55(0.023)  | Cytoplasm & cytoskeleton;                                                                           |
| IPI00878551                    | PDIA1_HUMAN  | Protein disulfide-isomerase                           | 5 | 51.2  | P4HB         | 890.92 | 14.23 | Q  | A  | 0.26(0.004)  | Endoplasmic reticulum lumen; Melanosome; Cell membrane; Peripheral membrane protein <sup>P</sup>    |
| IPI00759832                    | 1433B_HUMAN  | 14-3-3 protein beta/alpha                             | 4 | 27.8  | YWHAB        | 1080.0 | 11.08 | Q  | A  | 0.43(0.048)  | Cytoplasm; Melanosome;                                                                              |
| IPI00658013                    | NPM_HUMAN    | Nucleophosmin                                         | 6 | 28.4  | NPM1         | 1114.1 | 9.17  | Q  | A  | 0.63(0.050)  | Nucleus & nucleolus; Cytoplasm & cytoskeleton & microtubule organizing center & centrosome;         |
| IPI00514561                    | HNRPK_HUMAN  | Heterogeneous nuclear ribonucleoprotein K             | 5 | 47.5  | HNRNPK       | 863.80 | 10.48 | Q  | ND | —(<0.001)    | Cytoplasm; Nucleus & nucleoplasm; Cell projection & podosome;                                       |
| IPI00297779                    | TCPB_HUMAN   | T-complex protein 1 subunit beta                      | 3 | 57.5  | CCT2         | 1145.1 | 11.87 | Q  | A  | 0.14(<0.001) | Cytoplasm;                                                                                          |
| IPI00216393                    | CLCA_HUMAN   | Clathrin light chain A                                | 2 | 23.6  | CLTA         | 1176.5 | 3.88  | Q  | A  | 0.23(0.006)  | Cytoplasmic vesicle membrane; Peripheral membrane protein; Cytoplasmic side; Membrane & coated pit; |
| IPI00020557                    | LRP1_HUMAN   | Prolow-density lipoprotein receptor-related protein 1 | 3 | 504.2 | LRP1         | 989.67 | 6.01  | Q  | ND | —(<0.001)    | Cell membrane; Membrane & coated pit;                                                               |
| IPI00018146                    | 1433T_HUMAN  | 14-3-3 protein theta                                  | 2 | 27.7  | YWHAQ        | 1073.0 | 10.93 | Q  | A  | 0.25(<0.001) | Cytoplasm;                                                                                          |

|             |              |                                      |   |      |       |        |       |   |   |              |                                                                          |
|-------------|--------------|--------------------------------------|---|------|-------|--------|-------|---|---|--------------|--------------------------------------------------------------------------|
| IPI00000816 | Q5CZQ1_DANRE | 14-3-3 protein epsilon               | 2 | 29.2 | YWHAE | 1044.5 | 11.69 | Q | A | 0.45(0.011)  | Cytoplasm <sup>s</sup> ; Melanosome;                                     |
| IPI00290566 | TCPA_HUMAN   | T-complex protein 1 subunit<br>alpha | 2 | 60.3 | TCP1  | 1177.2 | 6.57  | Q | A | 0.21(<0.001) | Cytoplasm; cytoskeleton & microtubule organizing<br>center & centrosome; |
| IPI00555698 | YBOX3_HUMAN  | Y-box-binding protein 3              | 7 | 35.9 | YBX3  | 891.93 | 12.26 | Q | A | 0.46(0.023)  | Cytoplasm; Nucleus;                                                      |

XBPs with a fold change of >1.5 or <0.67 are shown. Q: The quiescent LX-2, A: The activated LX-2; “A/Q” represents the fold change of a protein in the activated LX-2 vs. that in the quiescent LX-2. ND, not detected in the samples , “—”significantly differential expressed in the sample.

**Table S3 The detail information of the main KEGG pathway**

| NO.     | Name                                         | Protein NO.(%) |
|---------|----------------------------------------------|----------------|
| ko01100 | Metabolic pathways                           | 9 (20.5%)      |
| ko05169 | Epstein-Barr virus infection                 | 7 (15.9%)      |
| ko04141 | Protein processing in endoplasmic reticulum  | 7 (15.9%)      |
| ko01110 | Biosynthesis of secondary metabolites        | 6 (13.6%)      |
| ko03010 | Ribosome                                     | 6 (13.6%)      |
| ko00010 | Glycolysis / Gluconeogenesis                 | 5 (11.4%)      |
| ko01120 | Microbial metabolism in diverse environments | 5 (11.4%)      |
| ko01130 | Biosynthesis of antibiotics                  | 5 (11.4%)      |
| ko05203 | Viral carcinogenesis                         | 4 (9.09%)      |
| ko05016 | Huntington's disease                         | 4 (9.09%)      |
| ko01200 | Carbon metabolism                            | 4 (9.09%)      |
| ko04612 | Antigen processing and presentation          | 4 (9.09%)      |
| ko05206 | MicroRNAs in cancer                          | 4 (9.09%)      |
| ko04145 | Phagosome                                    | 4 (9.09%)      |
| ko01230 | Biosynthesis of amino acids                  | 4 (9.09%)      |
